# Supplementary material
Source: PubMed Central journal article supplement (PMC3059053)
Supplement: supp_M110.175547_jbc.M110.175547-1.pdf [file supp_M110.175547_jbc.M110.175547-1.pdf]

Table S1. Oligonucleotides used for site-directed mutagenesis of Ndi1

| Oligonucleotides | Sequences                                     |
|------------------|-----------------------------------------------|
| P92A-F           | 5'-GCTATTTCTTATTTACGGCTTTGTTACCTTCTGCACCAG-3' |
| P92A-R           | 5'-CTGGTGCAGAAGGTAACAAAGCCGTAAATAAGAAATAGC-3' |
| L93A-F           | 5'-CTTATTTACGCCTGCGTTACCTTCTGCACCAGTTGGG-3'   |
| L93A-R           | 5'-CCCAACTGGTGCAGAAGGTAACGCAGGCGTAAATAAG-3'   |
| L94A-F           | 5'-CTTATTTACGCCTTTGGCACCTTCTGCACCAGTTGGG-3'   |
| L94A-R           | 5'-CCCAACTGGTGCAGAAGGTGCCAAAGGCGTAAATAAG-3'   |
| L195A-F          | 5'-CTGATTACGGTCATTTTCGCGAAGGAAATCCCAAC-3'     |
| L195A-R          | 5'-GTTGGGAATTTTCCTTCGCGAAATGACCGTAATCAG-3'    |
| L195V-F          | 5'-GGGGTCACTGATTACGGTCATTTTCGTGAAGGAAATTC-3'  |
| L195V-R          | 5'-GAATTTCTTCACGAAATGACCGTAATCAGTGACCCC-3'    |
| L195I-F          | 5'-GGGGTCACTGATTACGGTCATTTTCATCAAGGAAATTC-3'  |
| L195I-R          | 5'-GAATTTCTTTGATGAAATGACCGTAATCAGTGACCCC-3'   |
| T239A-F          | 5'-GGTGGTGGGCCTGCTGGTGTAGAGG-3'               |
| T239A-R          | 5'-CCTCTACACCAGCAGGCCACCACC-3'                |
| E242A-F          | 5'-CCTACTGGTGTAGCGGCCGCTGGTG-3'               |
| E242A-R          | 5'-CACCAGCGGCCGCTACACCAGTAGG-3'               |
| E242Q-F          | 5'-CCTACTGGTGTACAGGCCGCTGGTG-3'               |
| E242Q-R          | 5'-CACCAGCGGCCTGTACACCAGTAGG-3'               |
| E242D-F          | 5'-CCTACTGGTGTAGACGCCGCTGGTG-3'               |
| E242D-R          | 5'-CACCAGCGCGTCTACACCAGTAGG-3'                |
| E246Q-F          | 5'-GAGGCCGCTGGTCAACTACAGGATTATGTTC-3'         |
| E246Q-R          | 5'-GAACATAATCCTGTAGTTGACCAGCGGCCTC-3'         |
| N341A-F          | 5'-GGGCCACGGGTGCCAAGGCAAGACC-3'               |
| N341A-R          | 5'-GGTCTTGCCTTGGCACCCGTGGCCC-3'               |
| D383A-F          | 5'-CGCCATTGGTGCCAATGCATTTGCTGGG-3'            |
| D383A-R          | 5'-CCCAGCAAATGCATTGGCACCAATGGCG-3'            |
| D383N-F          | 5'-CGCCATTGGTAACAATGCATTTGCTGGG-3'            |
| D383N-R          | 5'-CCCAGCAAATGCATTGTTACCAATGGCG-3'            |
| D383E-F          | 5'-CGCCATTGGTGAGAATGCATTTGCTGGG-3'            |
| D383E-R          | 5'-CCCAGCAAATGCATTCTACCAATGGCG-3'             |
| D383Q-F          | 5'-CGCCATTGGTCAGAATGCATTTGCTGGGTTGC-3'        |
| D383Q-R          | 5'-GCAACCCAGCAAATGCATTCTGACCAATGGCG-3'        |
| T392A-F          | 5'-GGGTTGCCACCAGCCGCCAAGTAG-3'                |
| T392A-R          | 5'-CTACTTGGGCGGCTGGTGGCAACCC-3'               |
