# Supplementary material
Source: PubMed Central journal article supplement (PMC3059053)
Supplement: supp_M110.175547_jbc.M110.175547-3.pdf [file supp_M110.175547_jbc.M110.175547-3.pdf]

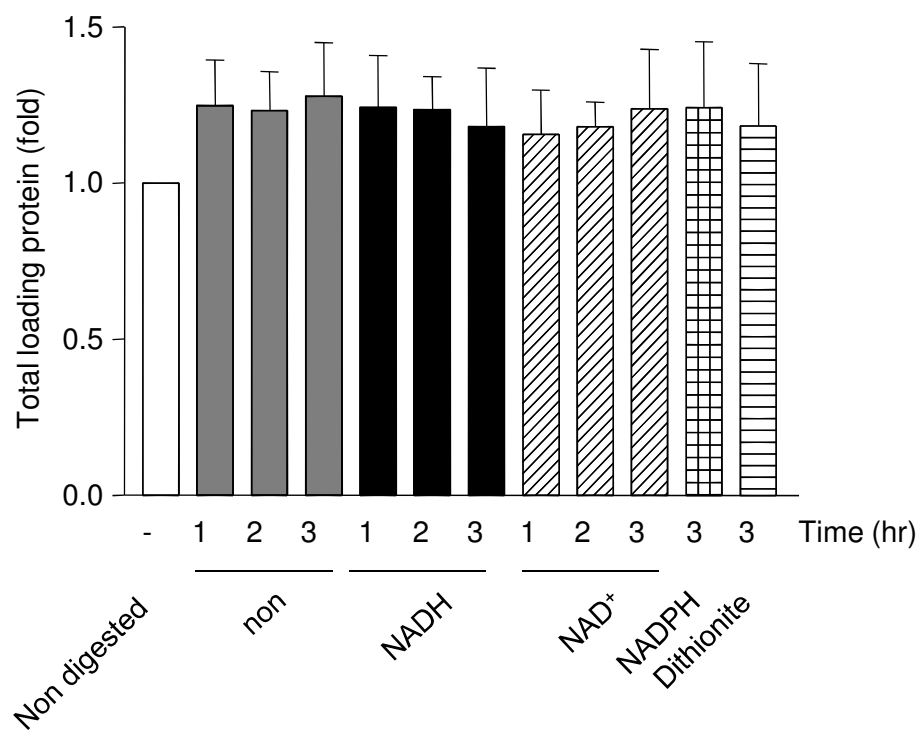

Supplemental Fig. 2. Comparison of total loading protein in each lane on a SDS gel in Fig. 3. All band intensities in each lane were summed up with NIH image. There was no significant difference among the lanes. The *p*-value was calculated by unpaired student's *t*-test. Each value and vertical bar represents the mean  $\pm$  SE (*n* = 3).
