# Supplementary material
Source: PubMed Central journal article supplement (PMC3059053)
Supplement: supp_M110.175547_jbc.M110.175547-4.pdf [file supp_M110.175547_jbc.M110.175547-4.pdf]

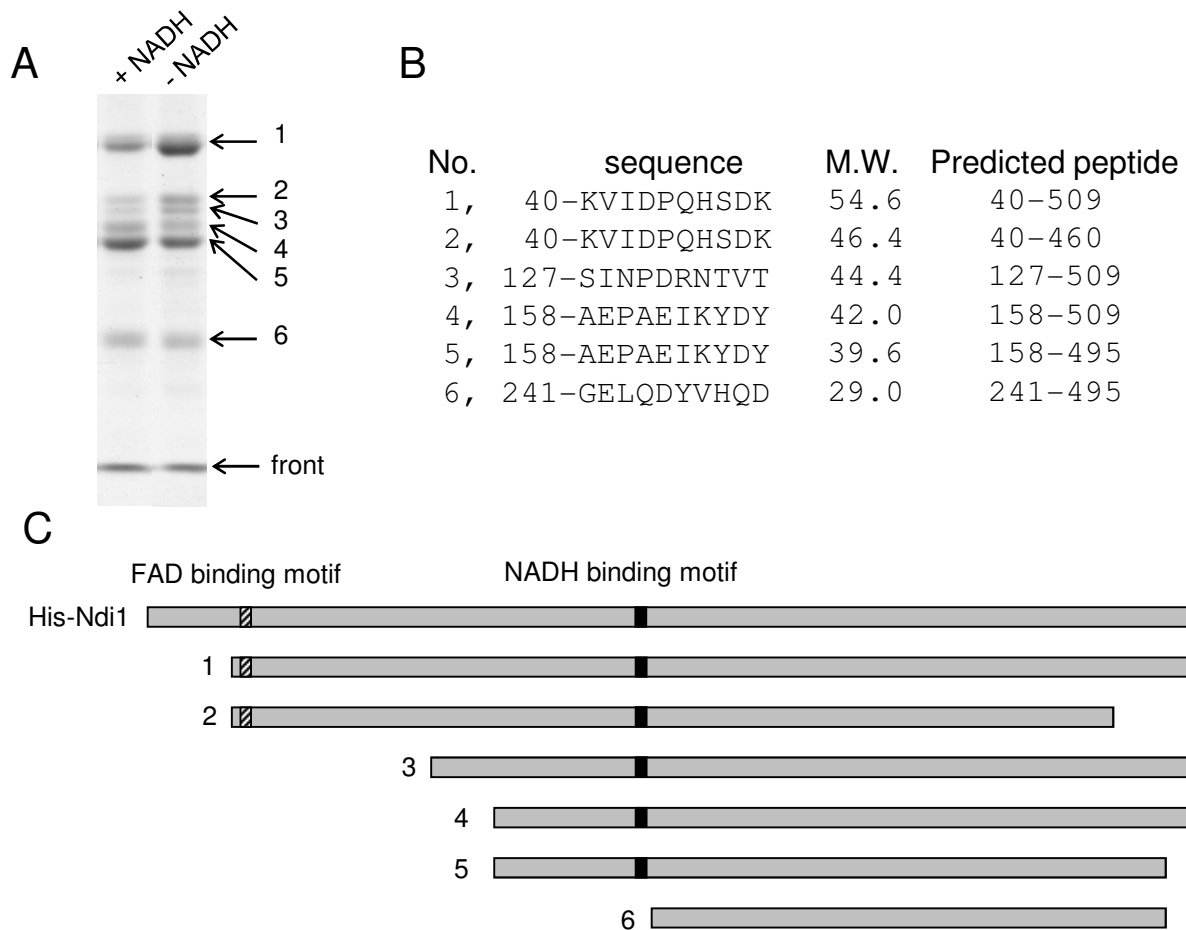

**Supplemental Fig. 3.** Proteinase K-digested peptides of Ndi1. *A*, The numbers indicate the digested peptides, and correspond to the numbers in panels *B* and *C*. *B*, N-terminal amino acid sequence of each peptide. Molecular weight of each peptide was calculated from the mobility on SDS-PAGE. *C*, Visualized models of digested peptides. Peptides number 1 to 5 contain the NADH binding motif (GXGXXG).
