# Supplementary material
Source: PubMed Central journal article supplement (PMC3059053)
Supplement: supp_M110.175547_jbc.M110.175547-6.pdf [file supp_M110.175547_jbc.M110.175547-6.pdf]

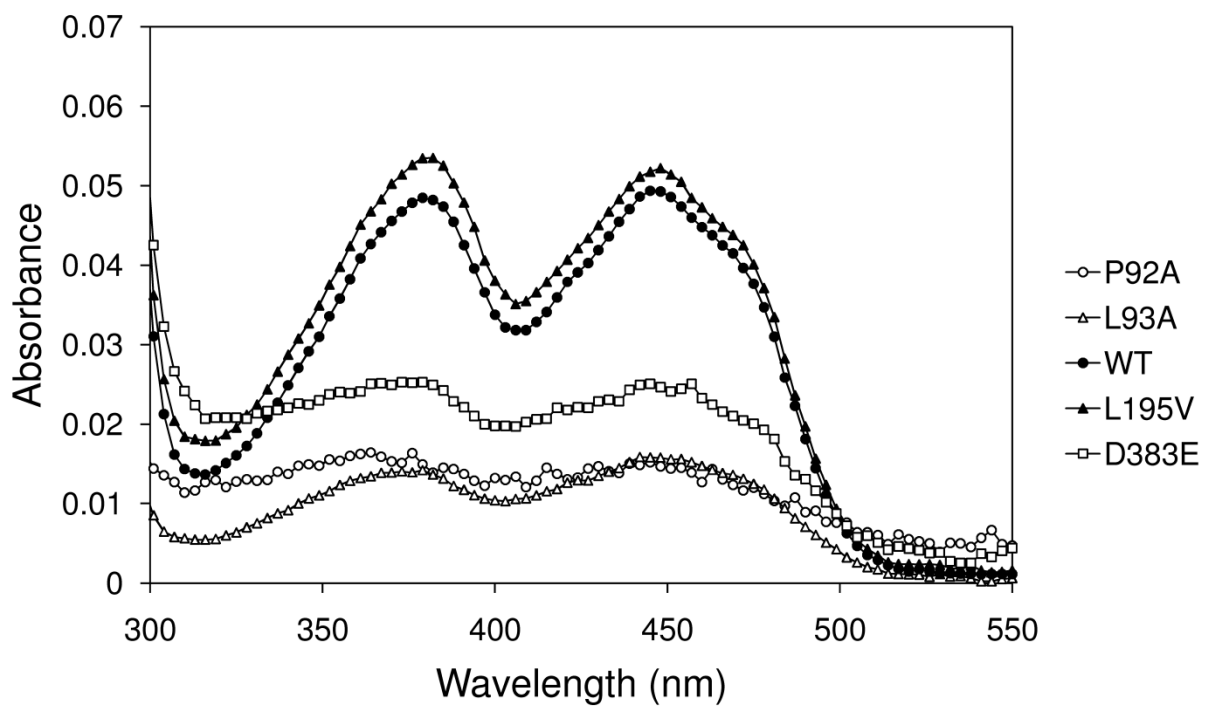

Supplemental Fig. 5. Absorption spectra of isolated wild-type and mutant Ndi1. The spectra were measured on a ND-1000 spectrophotometer and normalized to the concentration (5  $\mu$ M). The spectra represent the average of five independent measurements.
